# Supplementary material for: Comparison of 10 single and stepped methods to identify frail older persons in primary care: diagnostic and prognostic accuracy
Source: Springer Nature journal article supplement (doi:10.1186/s12875-016-0487-y), 2016-08-03
Supplement: MOESM2 [file 10556860]

| PRESELECTION ICPC $\geq 2$ (52.5%) |              |                            |                            | PRESELECTION ICPC $\geq 3$ (30.7%) |                     |                     | PRESELECTION ICPC $\geq 4$ (17.8%) |                      |                      |
|------------------------------------|--------------|----------------------------|----------------------------|------------------------------------|---------------------|---------------------|------------------------------------|----------------------|----------------------|
| Combination                        | Prevalence   | AUC Panel (95% C.I.)       | AUC Fried (95% C.I.)       | Prevalence                         | AUC Panel           | AUC Fried           | Prevalence                         | AUC Panel (95% C.I.) | AUC Fried (95% C.I.) |
| Judgment GP                        | <b>23.9%</b> | <b>0.716 (0.694-0.737)</b> | <b>0.731 (0.704-0.758)</b> | 13.8%                              | 0.644 (0.621-0.667) | 0.644(0.614-0.675)  | 9.1%                               | 0.652 (0.629-0.676)  | 0.642 (0.611-0.673)  |
| PRISMA7                            |              |                            |                            |                                    |                     |                     |                                    |                      |                      |
| $\geq 3$                           | <b>18.3%</b> | <b>0.724 (0.702-0.746)</b> | <b>0.801 (0.775-0.826)</b> | 11.2%                              | 0.667 (0.644-0.690) | 0.697 (0.667-0.728) | 7.7%                               | 0.639 (0.616-0.663)  | 0.688 (0.657-0.719)  |
| $\geq 4$                           | 10.7%        | 0.672 (0.649-0.695)        | 0.700 (0.670-0.731)        | 6.5%                               | 0.612 (0.689-0.636) | 0.609 (0.578-0.641) | 4.2%                               | 0.594 (0.571-0.618)  | 0.622 (0.591-0.654)  |
| $\geq 5$                           | 3%           | 0.533 (0.510-0.555)        | 0.598 (0.566-0.629)        | 1.8%                               | 0.540 (0.518-0.563) | 0.548 (0.518-0.579) | 1.8%                               | 0.540 (0.518-0.563)  | 0.548 (0.518-0.579)  |
| GFI                                |              |                            |                            |                                    |                     |                     |                                    |                      |                      |
| $\geq 4$                           | 25.9%        | 0.668 (0.647-0.690)        | 0.690 (0.662-0.718)        | 16.4%                              | 0.644 (0.621-0.667) | 0.656 (0.626-0.686) | 10.5%                              | 0.666 (0.643-0.689)  | 0.661 (0.630-0.691)  |
| $\geq 5$                           | <b>18.9%</b> | <b>0.680 (0.658-0.703)</b> | <b>0.730 (0.702-0.758)</b> | 12.9%                              | 0.650 (0.627-0.673) | 0.676 (0.646-0.707) | 9.3%                               | 0.657 (0.634-0.680)  | 0.667 (0.637-0.698)  |
| $\geq 6$                           | 9.6%         | 0.593 (0.570-0.616)        | 0.621 (0.590-0.652)        | 4.8%                               | 0.573 (0.550-0.596) | 0.561 (0.539-0.591) | 3.0%                               | 0.567 (0.544-0.590)  | 0.541 (0.511-0.571)  |
| EFS                                |              |                            |                            |                                    |                     |                     |                                    |                      |                      |
| $\geq 4$                           | <b>12.8%</b> | <b>0.685 (0.662-0.708)</b> | <b>0.764 (0.735-0.792)</b> | 7.7%                               | 0.652 (0.629-0.676) | 0.709 (0.678-0.739) | 6.4%                               | 0.643 (0.619-0.666)  | 0.686 (0.655-0.718)  |
| $\geq 6$                           | 4.2%         | 0.559 (0.536-0.583)        | 0.620 (0.589-0.651)        | 3.0%                               | 0.567 (0.544-0.590) | 0.571 (0.540-0.601) | 3.0%                               | 0.567 (0.544-0.590)  | 0.571 (0.540-0.601)  |
| ISAR PC                            |              |                            |                            |                                    |                     |                     |                                    |                      |                      |
| $\geq 2$                           | 30.3%        | 0.689 (0.668-0.710)        | 0.722 (0.714-0.767)        | 17.7%                              | 0.669 (0.647-0.692) | 0.678 (0.649-0.708) | 9.9%                               | 0.670 (0.647-0.693)  | 0.693 (0.663-0.724)  |
| $\geq 3$                           | <b>26.9%</b> | <b>0.711 (0.690-0.732)</b> | <b>0.740 (0.696-0.748)</b> | 15%                                | 0.687 (0.664-0.710) | 0.694 (0.664-0.723) | 9.9%                               | 0.670 (0.647-0.693)  | 0.693 (0.663-0.724)  |
| FI                                 |              |                            |                            |                                    |                     |                     |                                    |                      |                      |
| $\geq 0.20$                        | <b>26%</b>   | <b>0.759 (0.738-0.779)</b> | 0.775 (0.751-0.800)        | 15.9%                              | 0.687 (0.665-0.710) | 0.689 (0.659-0.719) | 10.7%                              | 0.705 (0.682-0.728)  | 0.689 (0.659-0.720)  |
| $\geq 0.25$                        | <b>13.4%</b> | 0.720 (0.697-0.742)        | <b>0.791 (0.763-0.818)</b> | 10.4%                              | 0.654 (0.631-0.677) | 0.720 (0.690-0.750) | 7.6%                               | 0.655 (0.631-0.678)  | 0.706 (0.676-0.737)  |
| $\geq 0.30$                        | 6.7%         | 0.630 (0.607-0.654)        | 0.667 (0.636-0.698)        | 5.5%                               | 0.604 (0.580-0.627) | 0.615 (0.584-0.628) | 4.3%                               | 0.594 (0.571-0.618)  | 0.593 (0.562-0.628)  |
| $\geq 0.35$                        | 4.3%         | 0.594 (0.571-0.618)        | 0.622 (0.591-0.654)        | 3.6%                               | 0.581 (0.557-0.604) | 0.596 (0.565-0.628) | 3.6%                               | 0.581 (0.557-0.604)  | 0.596 (0.565-0.628)  |
| $\geq 0.40$                        | 1.8%         | 0.540 (0.517-0.563)        | 0.578 (0.547-0.608)        | 1.8%                               | 0.540 (0.517-0.563) | 0.578 (0.547-0.608) | 1.8%                               | 0.540 (0.517-0.563)  | 0.578 (0.547-0.608)  |
| InterRAI                           | <b>13.8%</b> | <b>0.679 (0.656-0.702)</b> | <b>0.759 (0.730-0.787)</b> | 9.7%                               | 0.638 (0.614-0.661) | 0.667 (0.636-0.698) | 7.6%                               | 0.652 (0.629-0.676)  | 0.680 (0.649-0.711)  |
| Gait speed                         | <b>16.3%</b> | <b>0.727 (0.704-0.750)</b> | <b>0.883 (0.862-0.904)</b> | 11.7%                              | 0.678 (0.654-0.703) | 0.787 (0.758-0.815) | 7.5%                               | 0.650 (0.626-0.675)  | 0.780 (0.750-0.810)  |
| Self-rated Health                  |              |                            |                            |                                    |                     |                     |                                    |                      |                      |
| $\leq 7$                           | <b>20%</b>   | <b>0.667 (0.644-0.689)</b> | 0.736 (0.734-0.792)        | 12.5%                              | 0.647 (0.623-0.671) | 0.674 (0.642-0.706) | 9.4%                               | 0.649 (0.625-0.673)  | 0.659 (0.627-0.692)  |
| $\leq 6$                           | 7.8%         | 0.630 (0.606-0.654)        | <b>0.741 (0.707-0.774)</b> | 4.3%                               | 0.581 (0.557-0.605) | 0.637 (0.603-0.670) | 3.6%                               | 0.567 (0.543-0.591)  | 0.608 (0.575-0.641)  |
| $\leq 5$                           | 4.2%         | 0.599 (0.575-0.623)        | 0.654 (0.619-0.689)        | 2.4%                               | 0.609 (0.586-0.633) | 0.583 (0.550-0.615) | 2.4%                               | 0.557 (0.533-0.580)  | 0.583 (0.550-0.615)  |
| Polypharmacy                       |              |                            |                            |                                    |                     |                     |                                    |                      |                      |
| $\geq 5$                           | <b>20.2%</b> | 0.696 (0.667-0.725)        | <b>0.696 (0.665-0.726)</b> | 12.9%                              | 0.621 (0.598-0.644) | 0.679 (0.649-0.709) | 9.9%                               | 0.641 (0.617-0.664)  | 0.696 (0.665-0.726)  |
| $\geq 6$                           | 15%          | 0.696 (0.666-0.726)        | 0.673 (0.642-0.704)        | 10.5%                              | 0.602 (0.579-0.625) | 0.663 (0.632-0.694) | 8.7%                               | 0.614 (0.590-0.637)  | 0.673 (0.642-0.704)  |
| $\geq 7$                           | 12.3%        | <b>0.711 (0.681-0.741)</b> | 0.680 (0.649-0.711)        | 9.4%                               | 0.609 (0.586-0.633) | 0.669 (0.639-0.700) | 7.6%                               | 0.621 (0.598-0.645)  | 0.680 (0.649-0.711)  |

| PRESELECTION GP (28.6%) |              |                            |                            |
|-------------------------|--------------|----------------------------|----------------------------|
| Combination             | Prevalence   | AUC Panel (95% C.I.)       | AUC Fried (95% C.I.)       |
| Judgment GP             |              |                            |                            |
| PRISMA7                 |              |                            |                            |
| ≥ 3                     | <b>15.5%</b> | <b>0.727 (0.705-0.749)</b> | <b>0.732 (0.703-0.760)</b> |
| ≥ 4                     | 10.1%        | 0.658 (0.635-0.682)        | 0.674 (0.644-0.705)        |
| ≥ 5                     | 2.4%         | 0.519 (0.497-0.542)        | 0.572 (0.541-0.603)        |
| GFI                     |              |                            |                            |
| ≥ 4                     | 17.7%        | 0.690 (0.667-0.712)        | 0.681 (0.651-0.710)        |
| ≥ 5                     | <b>12.4%</b> | <b>0.707 (0.685-0.730)</b> | <b>0.711 (0.681-0.741)</b> |
| ≥ 6                     | 7.2%         | 0.627 (0.603-0.650)        | 0.664 (0.633-0.695)        |
| EFS                     |              |                            |                            |
| ≥4                      | <b>12.3%</b> | <b>0.724 (0.702-0.747)</b> | <b>0.738 (0.709-0.768)</b> |
| ≥6                      | 4.2%         | 0.560 (0.537-0.583)        | 0.591 (0.560-0.622)        |
| ISAR PC                 |              |                            |                            |
| ≥2                      | 22.8%        | 0.723 (0.701-0.744)        | 0.679 (0.650-0.708)        |
| ≥3                      | <b>21%</b>   | <b>0.734 (0.713-0.756)</b> | <b>0.689 (0.660-0.718)</b> |
| FI                      |              |                            |                            |
| ≥ 0.20                  | <b>18.2%</b> | <b>0.772 (0.751-0.793)</b> | 0.763 (0.736-0.790)        |
| ≥ 0.25                  | <b>9.9%</b>  | 0.722 (0.699-0.754)        | <b>0.754 (0.725-0.783)</b> |
| ≥ 0.30                  | 6.0%         | 0.635 (0.611-0.658)        | 0.671 (0.639-0.702)        |
| ≥ 0.35                  | 4.2%         | 0.594 (0.671-0.618)        | 0.622 (0.591-0.654)        |
| ≥ 0.40                  | 1.8%         | 0.540 (0.518-0.563)        | 0.578 (0.547-0.608)        |
| InterRAI                | <b>11.7%</b> | <b>0.711 (0.688-0.733)</b> | <b>0.771 (0.742-0.799)</b> |
| Gait speed              | <b>12.6%</b> | <b>0.682 (0.658-0.707)</b> | <b>0.801 (0.773-0.830)</b> |
| Self-rated              |              |                            |                            |
| Health                  | <b>13.3%</b> | <b>0.734 (0.704-0.765)</b> | <b>0.668 (0.645-0.691)</b> |
| ≤ 7                     | 6.8%         | 0.655 (0.622-0.688)        | 0.630 (0.607-0.654)        |
| ≤ 6                     | 3.7%         | 0.608 (0.575-0.641)        | 0.581 (0.557-0.604)        |
| ≤ 5                     |              |                            |                            |
| Polypharmacy            | 13.3%        | <b>0.705 (0.675-0.735)</b> | <b>0.665 (0.642-0.688)</b> |
| ≥5                      | 11.7%        | 0.685 (0.655-0.716)        | 0.660 (0.636-0.683)        |
| ≥6                      | 11.7%        | 0.685 (0.655-0.716)        | 0.660 (0.636-0.683)        |
| ≥7                      |              |                            |                            |

\*Highest AUC-values are highlighted for every preselection method.
